# 1 **Genome-wide DNA methylation predicts environmentally-driven** 2 **life history variation in a marine fish**

3  
4 Hugo Cayuela<sup>1,2\*</sup>, Clément Rougeux<sup>3</sup>, Martin Laporte<sup>1</sup>, Claire Mérot<sup>1</sup>, Eric Normandeau<sup>1</sup>, Maëva  
5 Leitwein<sup>1</sup>, Yann Dorant<sup>1</sup>, Kim Præbel<sup>4</sup>, Ellen Kenchington<sup>5</sup>, Marie Clément<sup>6,7</sup>, Pascal Sirois<sup>8</sup>, Louis  
6 Bernatchez<sup>1</sup>

7  
8 <sup>1</sup>Institut de Biologie Intégrative et des Systèmes (IBIS), Université Laval, Quebec City, Quebec, Canada

9 <sup>2</sup>Department of Ecology and Evolution, University of Lausanne, 1015 Lausanne Switzerland

10 <sup>3</sup>Department of Biological Sciences, University of Calgary, Calgary, Canada

11 <sup>4</sup>Norwegian College of Fishery Science, Faculty of Biosciences, Fisheries and Economics, UiT The Arctic  
12 University of Norway, Tromsø, Norway.

13 <sup>5</sup>Department of Fisheries and Oceans, Bedford Institute of Oceanography, Dartmouth, Nova Scotia, Canada

14 <sup>6</sup> Centre for Fisheries Ecosystems Research, Fisheries and Marine Institute of Memorial University of  
15 Newfoundland, St. John's, NL, Canada

16 <sup>7</sup> Labrador Institute, Memorial University of Newfoundland, Happy Valley-Goose Bay, NL, Canada

17 <sup>8</sup>Département des sciences fondamentales, Université du Québec à Chicoutimi, Chicoutimi, Quebec, Canada

18 \*Corresponding author; Email: hugo.cayuela51@gmail.com

## 19 **Abstract**

20  
21 The molecular mechanisms underlying intraspecific variation in life history strategies are still poorly  
22 understood, despite the importance of this question for understanding of organism's responses to  
23 environmental variability. Theoretical work proposed that epigenetic mechanisms such as DNA  
24 methylation might regulate intraspecific variation in life history strategies, however this assumption has  
25 rarely been verified empirically in wild populations. We examined associations between genome-wide  
26 methylation changes and environmentally-driven life history variation in two lineages of a marine fish  
27 that diverged approximately 2.5 Mya, the capelin (*Mallotus villosus*), from North America and  
28 Europe. In both lineages, capelin harbour two contrasted life history strategies: some are strictly  
29 semelparous, experience fast actuarial senescence, but benefit from high hatching success by spawning  
30 on demersal sites where water temperature is low and relatively stable. In contrast, others are facultative  
31 iteroparous, have slower actuarial senescence, and suffer from lower hatching success by breeding in  
32 the intertidal zone where temperature is warmer, thermohaline parameters are less stable, and egg  
33 desiccation risk is high. Performing whole genome and epigenome sequencing, we showed that these  
34 contrasted life history strategies are more likely governed by epigenetic changes than by differences in  
35 DNA sequence. While genetic differentiation between the capelin harbouring different life history  
36 strategies was negligible, we detected parallel genome-wide methylation changes across lineages. We  
37 identified 1,067 differentially methylated regions (DMRs) comprising 15,818 CpGs, with 22% of them  
38 located within 5-kb around genes comprising promotor regions. We found that all DMRs were  
39 hypermethylated in demersal-spawning individuals. This striking result suggests that lower water  
40 temperature at demersal sites leads to an overall hypermethylation of the genome determined during the  
41 epigenetic reprogramming occurring over embryonic development. Our study emphasizes that parallel  
42 epigenetics changes in lineages with divergent genetic background could have a functional role in the  
43 regulation of intraspecific life history variation.

44  
45 **Keywords:** epigenetic, DNA methylation, life history, lifespan, aging, fish, *Mallotus villosus*

## 46 Introduction

47  
48 Spatio-temporal variability of the environment is a critical evolutionary driver shaping adaptive  
49 strategies in the wild (Blanquart et al. 2013, Savolainen et al. 2013). It determines the schedule of energy  
50 allocation of organisms over their lifetime, by affecting the resources that they invest in somatic  
51 maintenance (i.e., lifespan), growth, and reproduction (Stearns 1976, 1989). The theory of life history  
52 strategies (i.e., covariation between the items of energy expenditure; Promislow & Harvey 1989,  
53 Gaillard & Yoccoz 2003) states that the uncertainty of breeding success caused by environmental  
54 variability selects for a longer reproductive lifespan and a reduced clutch size at each breeding event  
55 (Murphy 1968, Wilbur & Rudolf 2006). Theoretical demographic models showed that extending  
56 reproductive lifespan allows organisms to reproduce on multiple occasions and adjust their breeding  
57 effort in a flexible way, which permits mitigation of the risk of reproductive failure in variable and  
58 unpredictable environments (Bulmer 1985, Tuljapurkar 2013). Field and experimental studies validated  
59 those theoretical expectations and showed that the level of environmental variability regulates the  
60 reproductive lifespan duration among different populations of the same species (Nevoux et al. 2010;  
61 Cayuela et al. 2016, 2019; Lind et al. 2020). However, the molecular mechanisms underlying such  
62 intraspecific variation in lifespan are still poorly understood, despite the tremendous importance of this  
63 topic for our understanding of organism's responses to environmental variability.

64 Our current knowledge of the genetic basis of lifespan and its correlations with other life-history  
65 components is currently restricted to a handful of genomic studies that have highlighted the polygenic  
66 architecture of these traits, mostly in model organisms (e.g., Browner et al. 2004, Valenzano et al. 2015,  
67 Austad & Hoffman 2018, Flatt & Partridge 2018). Although reproductive lifespan is under partial  
68 genetic control, both demographic and genetic quantitative studies have generally revealed the low  
69 heritability ( $h^2$ ) and plastic character of life history components under spatiotemporal environmental  
70 variation (Price & Schluter 1991, Merilä & Sheldon 1999, Hoffmann et al. 2016). Therefore, one may  
71 expect that alternative molecular mechanisms able to modulate gene expression without any change in  
72 the DNA sequence (referred to as epigenetics; e.g., Goldberg et al. 2007), might play a central role in  
73 the regulation of lifespan and life history strategies (Parrott & Bertucci 2019).

74 DNA methylation (called methylation hereafter) is the most extensively studied epigenetic  
75 mechanism (Smith & Meissner 2013, Klutstein et al. 2016) and has been reported to be a strong predictor  
76 of lifespan and aging across mammals (Pal & Tyler 2016, Lowe et al. 2018) and very recently in  
77 fishes (Anastasiadi & Piferrer 2020). For instance, using the methylation status of ~300 cytosines across  
78 the genome, one may predict the chronological age of an individual with an error of only 3.6 years  
79 (correlation coefficient 0.96) and 3.33 weeks (correlation coefficient 0.84) in human and mouse,  
80 respectively (Horvath 2013, Stubbs et al. 2017). Despite the unprecedented accuracy of recently  
81 developed epigenetic clocks, the discrepancy between an individual's methylation age and  
82 chronological age varies, and the magnitude and directionality of this discordance are associated with  
83 physiological function and life history traits (Parrott & Bertucci 2019). In humans, an acceleration of  
84 methylation age correlates with an increase of mortality risk (Marioni et al. 2015), likely because  
85 accelerated epigenetic aging is associated with increased risk of age-related diseases (Horvath & Raj  
86 2018) and aberrant gene expression (Reynolds et al. 2014). Although the discrepancies between  
87 methylation and chronological ages seem partially determined by the genetic background (Marioni et  
88 al. 2015), environmental conditions experienced during early development could exert a strong influence  
89 on the degree of epigenetic-to-chronological age discordance experienced later in life (Parrott &  
90 Bertucci 2019).

91 Here, we tested the association between genome-wide methylation (CpG islands) and  
92 intraspecific variation of life history strategy associated with contrasted environmental spawning  
93 conditions (**Fig.1**). Capelin (*Mallotus villosus*), a small marine pelagic fish with a circumpolar

94 distribution, displays two life history strategies (Christiansen et al. 2008; **Fig.1**) anchored in multiple  
 95 ancient lineages that diverged approximately 2.5 Mya (Dodson et al. 2007, Cayuela et al. 2020).  
 96 Capelin adopting demersal spawning are strictly semelparous (i.e., single reproductive event over  
 97 lifetime) and experience a strong actuarial senescence (i.e., increase of mortality after breeding)  
 98 irrespective of sex (Christiansen et al. 2008). They reproduce at spawning sites located at water depths  
 99 ranging from 10 to 300 m, where environmental conditions are relatively predictable, and water  
 100 temperature is stable and low (Penton et al. 2012). Fish adopting the beach spawning strategy are  
 101 facultative iteroparous (i.e., one or two reproductive events over lifetime) in both sexes, suffer a weaker  
 102 post-breeding senescence, and reproduce in the intertidal zone where water temperature is relatively  
 103 warm but variable and desiccation risk caused by wind makes offspring survival highly unpredictable  
 104 (Frank & Leggett 1981, Leggett & Frank 1984, Penton et al. 2012). Previous studies showed negligible  
 105 genetic variation between pools of breeders of the two life history strategies in the North Atlantic  
 106 (Præbel et al. 2008, Kenchington et al. 2015, Cayuela et al. 2020).  
 107

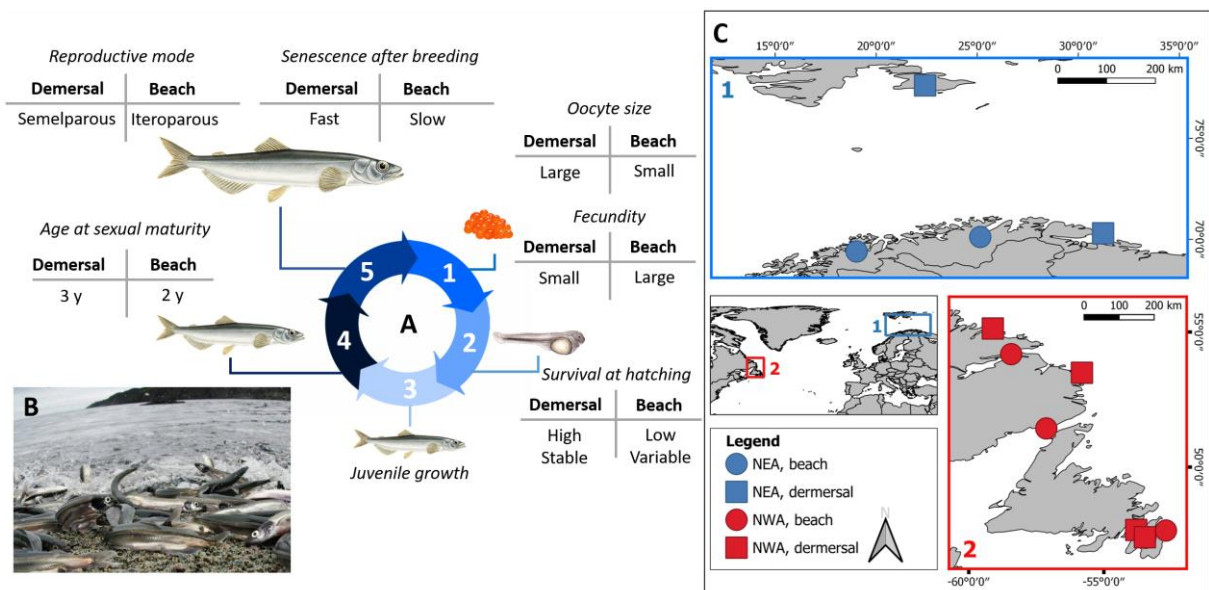

108 **Fig.1.** Alternative life history strategies in the capelin (*Mallotus villosus*) based on the work of Christiansen et al.  
 109 (2008) and study area. (A) Life history differences between demersal-spawning and beach-spawning individuals.  
 110 (1) Oocyte stage: demersal-spawning individuals reproduce at spawning sites located at water depth ranging from  
 111 10 to 250 m where environmental conditions are relatively cold, stable and predictable. By contrast, beach-  
 112 spawning individuals breed in the intertidal zone (B) where highly variable environmental conditions (i.e., variable  
 113 but generally warmer temperature and wind) are experienced. Demersal-spawning females produce less eggs than  
 114 beach-spawning females, but their eggs are larger. Egg development rate is drastically shorter due to warmer  
 115 temperature in beach-spawning sites than in demersal spawning sites (Penton et al. 2012) (2-3) Larval and juvenile  
 116 stages: survival at hatching is high and relatively stable over space and time in demersal spawning individuals  
 117 whereas it has the opposite characteristics in beach spawning individuals (Penton et al. 2012). Larval and juvenile  
 118 growth are performed at sea and no information about life history is available. (4) Subadult stage: sexual maturity  
 119 is usually reached at 2 or 3 years in the two life history phenotypes (Sirois, unpublished data). (5) Adult stage:  
 120 when they are sexually mature, demersal-spawning males and females reproduce once (i.e., strict semelparity) and  
 121 experience a strong actuarial senescence within the weeks following reproduction. By contrast, beach-spawning  
 122 individuals, especially females, may reproduce over two successive years (i.e., facultative iteroparity) and suffer  
 123 a weaker actuarial senescence (i.e. increase of mortality with age). Beach-spawning females does not suffer from  
 124 fecundity loss during the second reproductive event, suggesting negligible reproductive senescence.  
 125

126 We generated whole-genome-sequencing (WGS) and whole-genome-bisulfite-sequencing  
 127 (WGBS) data for both demersal and beach-spawning individuals from two ancient lineages occurring  
 128 in the north-east Atlantic Ocean (NEA lineage) and the north-west Atlantic Ocean (NWA lineage). An

129 association of life-history strategy with patterns of methylation would support a role of epigenetics as a  
130 molecular mechanism underlying the intraspecific variation of reproductive lifespan and life history  
131 strategy. First, using WGS data, we (1) quantified the extent of genetic divergence between demersal  
132 and beach-spawning individuals within each lineage. Then, using WGBS data, we (2) quantified the  
133 total amount of methylation independent of the genetic background, and (3) we quantified the total  
134 amount of methylation variation associated with lineages and history life strategy. To further support  
135 the hypothesis that no genetic basis underlies the association between methylation and history life  
136 strategy, we tested for this association after controlling for genetic background. Lastly, controlling for  
137 lineage, we identified differentially methylated CpGs (DMLs) and genomic regions (DMRs) associated  
138 with life history strategies.

139

## 140 **Methods**

141

### 142 *Sample collection and whole genome resequencing data*

143

144 We analyzed samples of 453 breeding adults (241 and 212 beach spawning and demersal individuals  
145 respectively) from 12 spawning sites (6 demersal sites and 6 beach spawning sites; **Fig.1**) located in the  
146 northwest (8 sites, NWA lineage) and northeast Atlantic (4 sites, NEA lineage) (for details see (see  
147 **Supplementary material S8, Table S1**). The DNA samples from two sites (DRL and BB65) were  
148 reused from a previous study (Kenchington et al. 2015). The fish were collected and a piece of dorsal  
149 fin was preserved in RNAlater or 96% EtOH. DNA was extracted with a salt-based method (Aljanabi  
150 & Martinez 1997) and an RNase A (Qiagen) treatment was applied following the manufacturer's  
151 recommendation. DNA quality was assessed using gel electrophoresis. A total of 453 individuals from  
152 the 12 spawning sites were sequenced for the whole-genome (WGS) at low coverage (~1.5X per  
153 individual) with the median sample size per site being 38 (range: 20 to 50) individuals. A subset of 55  
154 individuals from 11 spawning sites (excluding the DRL site for which DNA quality was too low for  
155 WGS) was sequenced at high coverage (~17X per individual) for whole-genome following a bisulfite  
156 conversion steps to tackle methylated cytosines (WGBS) (see **Supplementary material S8, Table S1**).

157

### 158 *Molecular analyses: whole-genome sequencing*

159

160 DNA quality of each extract was evaluated with nanodrop and on a 1% agarose gel electrophoresis.  
161 Only samples with acceptable ratios that showed clear high molecular weight bands were retained for  
162 library preparation. Following the approach used in Therkildsen & Palumbi (2017), we removed DNA  
163 fragments shorter than 1kb by treating each extract with Axygen beads in a 0.4:1 ratio, and eluted the  
164 DNA in 10mM Tris-Cl, pH 8.5. We measured DNA concentrations with Biotium Accuclear and  
165 normalised all samples at a concentration of 5ng/μL. Then, sample DNA extracts were randomized,  
166 distributed in 17 plates (96-well) and re-normalised at 2ng/μL.

167

168 Whole-genome high-quality libraries were prepared for each fish sample according to the  
169 protocol described in previous studies (Baym et al. 2015, Therkildsen & Palumbi 2017). Briefly, a  
170 tagmentation reaction using enzyme from the Nextera kit, which simultaneously fragments the DNA  
171 and incorporates partial adapters, was carried out in a 2.5 μl volume with approximately 2 ng of input  
172 DNA. Then, we used a two-step PCR procedure with a total of 12 cycles (8+4) to add the remaining  
173 Illumina adapter sequence with dual index barcodes and amplify the libraries. The PCR was conducted  
174 with the KAPA Library Amplification Kit and custom primers derived from Nextera XT set of barcodes  
175 (total 384 combinations – Table SX). Amplification products were purified from primers and size-  
176 selected with a two-steps Axygen beads cleaning protocol, first with a ratio 0.5:1, keeping the  
supernatant (medium and short DNA fragments), second with a ratio 0.75:1, keeping the beads (medium

177 fragments). Final concentration of the libraries were quantified with Biotium Accuclear and fragment  
178 size distribution was estimated with an Agilent BioAnalyzer for a subset of 10 to 20 samples per plate.  
179 Equimolar amount of 84 libraries were combined into 6 separate pools for sequencing on 6 lanes of  
180 paired-end 150bp reads on Illumina HiSeq2000 system.

181 Raw reads were trimmed and filtered for quality using the default parameters with FastP (Chen  
182 et al. 2018). Reads were aligned to the reference genome with BWA-MEM (Li & Durbin 2009) and  
183 filtered with samtools v1.8 (Li et al. 2009) to keep only unpaired, orphaned, and concordantly paired  
184 reads with a mapping quality over 10. Duplicate reads were removed with the MarkDuplicates module  
185 of Picard Tools v1.119 (<http://broadinstitute.github.io/picard/>). Then, we realigned reads around indels  
186 with the GATK IndelRealigner (McKenna et al. 2010). Finally, to avoid double-counting the sequencing  
187 support during SNP calling, we used the clipOverlap program in the bamUtil package v1.0.14 (Breese  
188 and Liu, 2013) to soft clip overlapping read ends and we kept only the read with the highest quality  
189 score in overlapping regions. This pipeline was inspired by Therkildsen & Palumbi (2017) and is  
190 available at [https://github.com/enormandeu/wgs\\_sample\\_preparation](https://github.com/enormandeu/wgs_sample_preparation).

191

### 192 *Molecular analyses: genome-wide DNA methylation*

193

194 Genome-wide DNA methylation maps generated by whole genome shotgun bisulfite sequencing  
195 (WGBS). DNA methylation mapping relied on the detection of cytosine / thymidine polymorphisms  
196 after bisulfite conversion. Treatment of genomic DNA with sodium bisulfite induces the deamination of  
197 unmethylated cytosine bases to uracil, while methylated cytosine bases remain unchanged. Hence, after  
198 PCR, unmethylated cytosines are detected as thymidines whereas remaining cytosines indicate cytosine  
199 methylation. The tracks display cytosine DNA methylation as percentage of reads with a thymine versus  
200 a cytosine (0 - 100%).

201 Library preparation and sequencing were performed at the Centre d'Expertise et de Services  
202 Genome Québec (Montréal, QC, Canada). Regarding library preparation, Genomic DNA was spiked  
203 with unmethylated  $\lambda$  DNA and fragmented. Fragments underwent end repair, adenylation of 3'ends, and  
204 adaptor ligation. Adaptor ligated DNA was bisulfite-converted followed by amplification by PCR.  
205 Library qualities were assessed using the Agilent 2100 BioAnalyzer (Agilent Technologies).

206 Libraries were sequenced on Illumina HiSeq2000 system. WGBS data processing was carried  
207 out as described by Johnson et al. (2012). In short, reads were aligned to the bisulfite converted reference  
208 genome using BWA; (i) clonal reads, (ii) reads with low mapping quality score, (iii) reads with  
209 mismatches to converted reference, (iv) reads mapping on the forward and reverse strand of the bisulfite  
210 converted genome, (v) read pairs not mapped at the expected distance based on library insert size, and  
211 (vi) read pairs that mapped in the wrong direction were removed.

212 Raw whole genome bisulphite sequencing (WGBS) reads were trimmed and cleaned for quality  
213 ( $\geq 25$ ), error rate (threshold of 0.15) and adaptor sequence using *trim\_galore* v0.4.5  
214 ([http://www.bioinformatics.babraham.ac.uk/projects/trim\\_galore/](http://www.bioinformatics.babraham.ac.uk/projects/trim_galore/)). Trimmed sequences were aligned to  
215 the capelin reference genome (Cayuela et al. 2020) using *BSseeker2* v2.1.5 (Guo et al. 2013) with  
216 *Bowtie2* v2.1.0 (Langmead & Salzberg 2012) in the end-to-end alignment mode. Duplicates were  
217 flagged in BAM files with the *Picard-tools* v1.119 program (<http://broadinstitute.github.io/picard/>),  
218 before determining methylation levels for each site by using the *BSseeker2* methylation call step. The  
219 raw methylation file was filtered by removing C-T DNA polymorphism identified from called  
220 genotypes, in order to avoid 'false' methylation variation at those positions (Le Luyer et al. 2017). We  
221 used the *CGmapTools* suite v0.1.1 (Guo et al. 2017) to extract only CpGs sites determined as CG context  
222 (avoiding CHH and CHG contexts), and with a coverage bounded between a minimum of 10X and a  
223 maximum of 100X in order to avoid noise from repetitive elements and putative paralog genes. Using

224 this set of parameters, we identified a total of 11,073,309 and 11,562,801 methylated loci (CpGs) in the  
225 lineage NWA and NEA respectively.

226

### 227 *SNP identification and genome-wide divergence among lineages and life history strategies*

228

229 Analyses of WGS data were carried out using ANGSD v0.931 (Korneliussen et al., 2014), a software  
230 specifically designed to take genotype uncertainty into account instead of basing the analysis on called  
231 genotypes. The analytical pipeline is available at [https://github.com/claimeerot/angsd\\_pipeline\\_](https://github.com/claimeerot/angsd_pipeline_). We  
232 kept input reads with a samtools flag below 255 (not primary, failure and duplicate reads, tag -  
233 remove\_bads = 1), with a minimum base quality score (minQ) of 20, a minimum mapping quality score  
234 (minMapQ) of 30q. We used the GATK genotype likelihood model (GL 2) to generate allelic frequency  
235 spectra, infer major and minor alleles (doMajorMinor 1), and estimate allele frequencies (doMaf 2). We  
236 filtered to keep only SNPs covered by at least one read in at least 50% of the individuals, with a total  
237 coverage below 1812 (4 times the number of individuals) to avoid including repeated regions in the  
238 analysis, and with minor allele frequency above 5%. In this way, we identified 6,711,583 SNPs. We  
239 then calculated  $F_{ST}$  between lineages and life history strategies, randomly subsampled to a similar size  
240 of 59 individuals. We used the realSFS function in ANGSD providing the previously obtained list of  
241 polymorphic SNPs and their polarisation as major or minor allele (options -sites and -doMajorMinor  
242 3).

243

### 244 *Decomposition of the genetic and methylation variation associated with lineages and life history* 245 *strategies*

246

247 To illustrate patterns of genetic variation, we extracted the genotype likelihood matrix of the 53  
248 individuals (that were also sequenced from WGBS), inferred the individual covariance matrix with  
249 *PCAngsd* (Meisner & Albrechtsen 2018) and decomposed it onto orthogonal axes using principal  
250 component analysis (PCA) using a scaling 2 transformation, which added an eigenvalue correction, to  
251 obtain the individuals PC scores (Legendre & Legendre 1998). For epigenetic variation, PC scores were  
252 similarly obtained from the CpGs methylation percentage matrix on the exact same individuals. All  
253 graphics representing genetic and epigenetic PC-axes show the average scores for four different groups  
254 (2 lineages  $\times$  2 habitats) with a 95% confidence interval. To assess if genetic variation can explain  
255 epigenetic variation, we produce a backward selection of the genetic PC-axes ( $P < 0.1$ ) on the response  
256 epigenetic matrix. All selected genetic PC-axes were then used to produce a redundancy analysis (RDA).  
257 The significance of the global model and individual genetic PC-axes were then tested with analyses of  
258 variance using 1,000 permutations of the data. The percentage of epigenetic variation explained by  
259 genetic variation was then computed based on an adjusted  $R^2$ . Next, we compared how genetic and  
260 epigenetic variation can be explained by lineages and life history strategies. Thus, we produced RDAs  
261 where lineage and life history strategy variables explained genetic or epigenetic PC-axes. An analysis  
262 of variance partitioning was produced on each RDA result to quantify the percentage of variance  
263 explained by: i) both lineage and life history strategy (i.e., shared variation), ii) lineage or life history  
264 strategy alone, and iii) lineage or life history strategy after controlling for the other variables. All  
265 statistics were computed with the software R, using the 'vegan' package.

266

### 267 *Genome-wide DMLs and DMRs candidates associated with lineages and life history strategies*

268

269 We applied a generalized linear model (GLM) implemented in the *DSS* R package (Wu et al. 2013) to  
270 identify differentially methylated loci (DMLs) and regions (DMRs) between lineages (NEA vs NWA)  
271 using life history strategy as a control covariate. Then, we applied another GLM to identify DMLs and

272 DMRs between life history strategies using lineage as a control covariate. For both GLMs, we controlled  
273 for interaction between terms, aiming to compare directly both lineages and reproductive strategies.  
274 CpGs showing a probability of *Bonferroni-corrected*  $P < 0.1$  were defined as DMLs. DMRs were  
275 retained when at least 10 DMLs occurred in a minimum sequence of 100bp with a probability threshold  
276 of *Bonferroni-corrected*  $P < 0.1$ . We allowed merging of DMRs less distant than 50bp to be defined as  
277 the same DMR. As quantitative metrics to characterize significant DMRs, we used a combination of the  
278 statistic describing the area difference under the curve (AreaStat) between methylation levels in DMR  
279 between conditions and the mean methylation level per DMR.

280

## 281 Results

282

### 283 *Assessing genomic variation between lineages and life history strategies*

284

285 Whole-genome-sequencing analyses showed pronounced genetic variation between NWA and NEA  
286 lineages, but negligible genetic differentiation between individuals of the two life history strategies  
287 within both lineages. RDA indicated that lineage was associated with 53.9% of the genetic variance  
288 (Global significance of both models:  $P < 0.001$ ) whereas no genetic variation associated with life history  
289 strategy was observed (**Fig.2**). Pairwise  $F_{ST}$  estimated between lineages and life history strategies  
290 confirmed this pattern (Table 1):  $F_{ST}$  was 0.23 between lineages and about two orders of magnitude less  
291 between life history within lineages (NWA: 0.003; NEA: 0.004).

292

293 **Table 1.** pairwise  $F_{ST}$  between lineages (NWA and NEA) and life history strategies (beach-spawning individuals  
294 BS, and demersal individuals D) within both lineages. Note that 95% CI cannot be calculated in ANGSD and are  
295 therefore not provided.

|        | NWA_BS | NWA_D  | NEA_BS | NEA_D |
|--------|--------|--------|--------|-------|
| NWA_BS | -      | -      | -      | -     |
| NWA_D  | 0.0032 | -      | -      | -     |
| NEA_BS | 0.2250 | 0.2254 | -      | -     |
| NEA_D  | 0.2369 | 0.2373 | 0.0042 | -     |

296

### 297 *Quantifying methylation variation between lineages and life history strategies*

298

299 Genome-wide methylation differed importantly between lineages (17.4% of variation explained by the  
300 lineage,  $P < 0.001$ ). In contrast with genomic variation, the RDA showed that life history strategy also  
301 explained a significant proportion (4.4%,  $P < 0.001$ ) of the total methylome variation (**Fig.2**). Our  
302 analyses also showed that a substantial part of the methylation variation associated with life history  
303 strategy was independent from the genetic background. Thus, we first quantified the amount of  
304 methylation that was explained by the genetic background as a whole. After backward selection, seven  
305 genetic PC-axes (PC-1, 35, 41, 42, 45, 48 and 52) representing 57.9% of genetic variation were kept ( $P$   
306  $< 0.1$ ) for the redundancy analysis to explain methylation variation. A total of 28.2% of the genome-  
307 wide methylation variation was significantly explained by genetic variation (Global significance of the  
308 model:  $P < 0.001$ ; only PC-1 and 35 were highly significant  $P < 0.001$ , the others PC-axes were  
309 significant under a threshold of  $P < 0.1$ ). Then, we built a RDA model where methylation variation was  
310 associated with life history strategy after controlling for genetic background. A total of 1.8% of all  
311 methylation variation (not explained by genetic background) was still associated with life history  
312 strategy (Global significance of the model:  $P < 0.001$ ).

313

### 314 *Identifying differentially methylated regions associated with lineages and life history strategies*

315  
316  
317  
318  
319  
320  
321  
322  
323  
324

Using GLMs, we determined the genomic regions involved in the 17.4% of the methylome varying between lineages. We identified 557,789 and 7,765 significant DMLs and DMRs (**Supplementary material S1**), respectively. The DMRs contained 121,424 CpGs. Seventy-nine percent of the DMRs (6,156 DMRs) were hypermethylated in NEA, indicating an overall hypermethylation trend in this lineage. Nine percent of the 7,765 DMRs (i.e., 739; **Supplementary material S2**) were located within 5-kb region around genes whereas less than 1% of those DMRs (50 DMRs; **Supplementary material S2**) were located within protein-coding genes involved in various molecular and cellular processes (transcript names and GOs provided in **Supplementary material S3**).

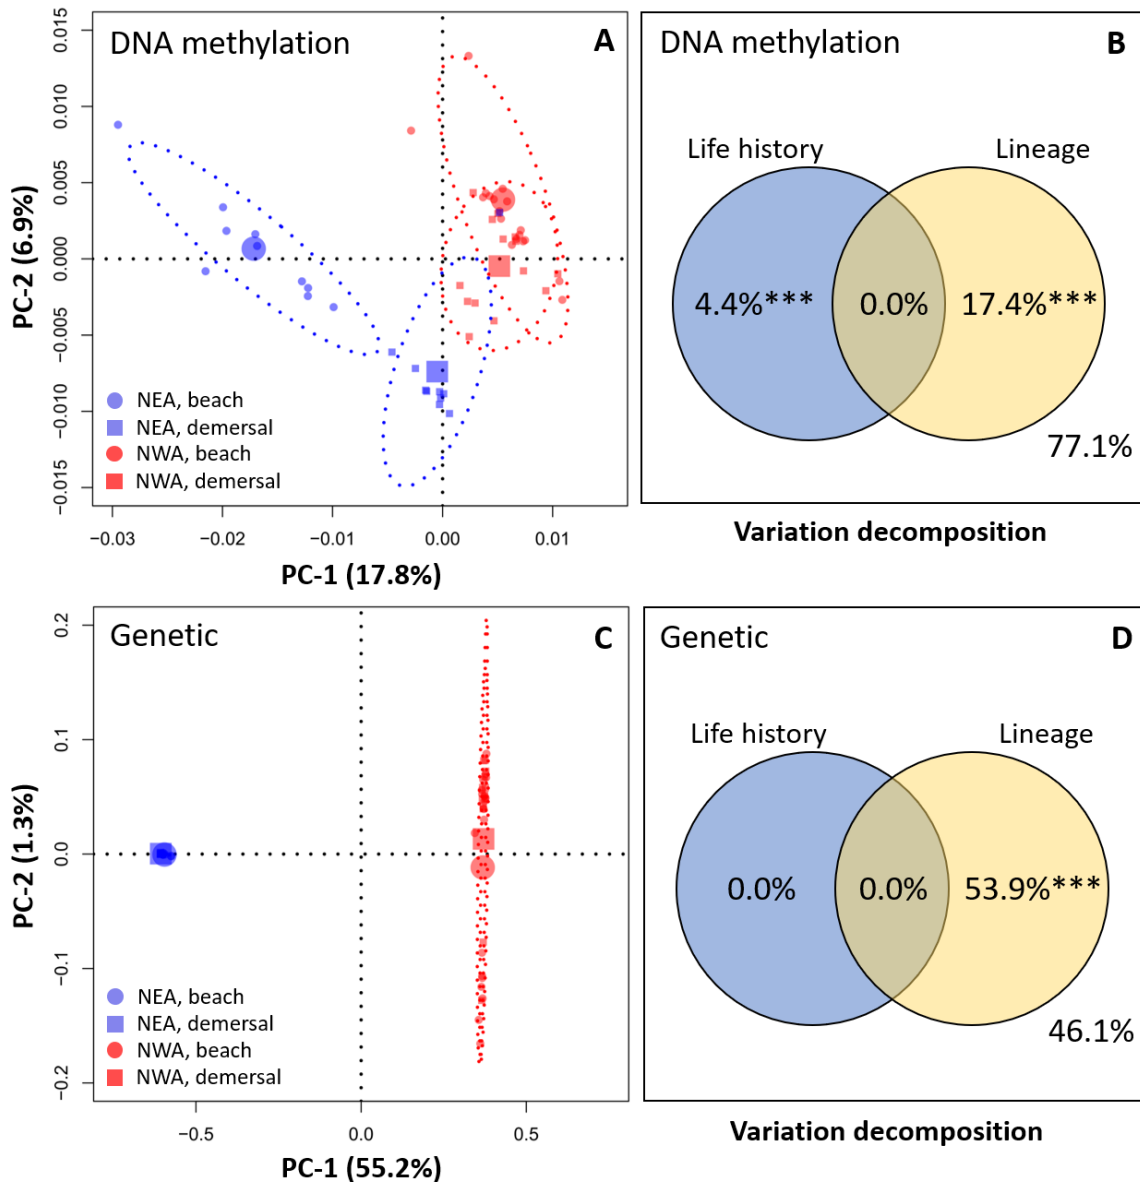

325  
326 **Fig.2.** Principal component analyses (A and C) and partial redundancy analyses (B and D) showing the proposition  
327 of methylation (A and B) and genetic (C and D) variation associated with life history (beach spawning vs demersal  
328 individuals) and lineages (NEA and NWA). In A and C: centroids represent the mean of the four groups (NEA  
329 beach, NEA demersal, NWA beach, and NWA demersal) and ellipses show 95% confidence intervals. In B and  
330 C: the proportion of variation non-explained by the model (i.e., residual variance) is 77.1% (B) and 46.1% (C).  
331  
332



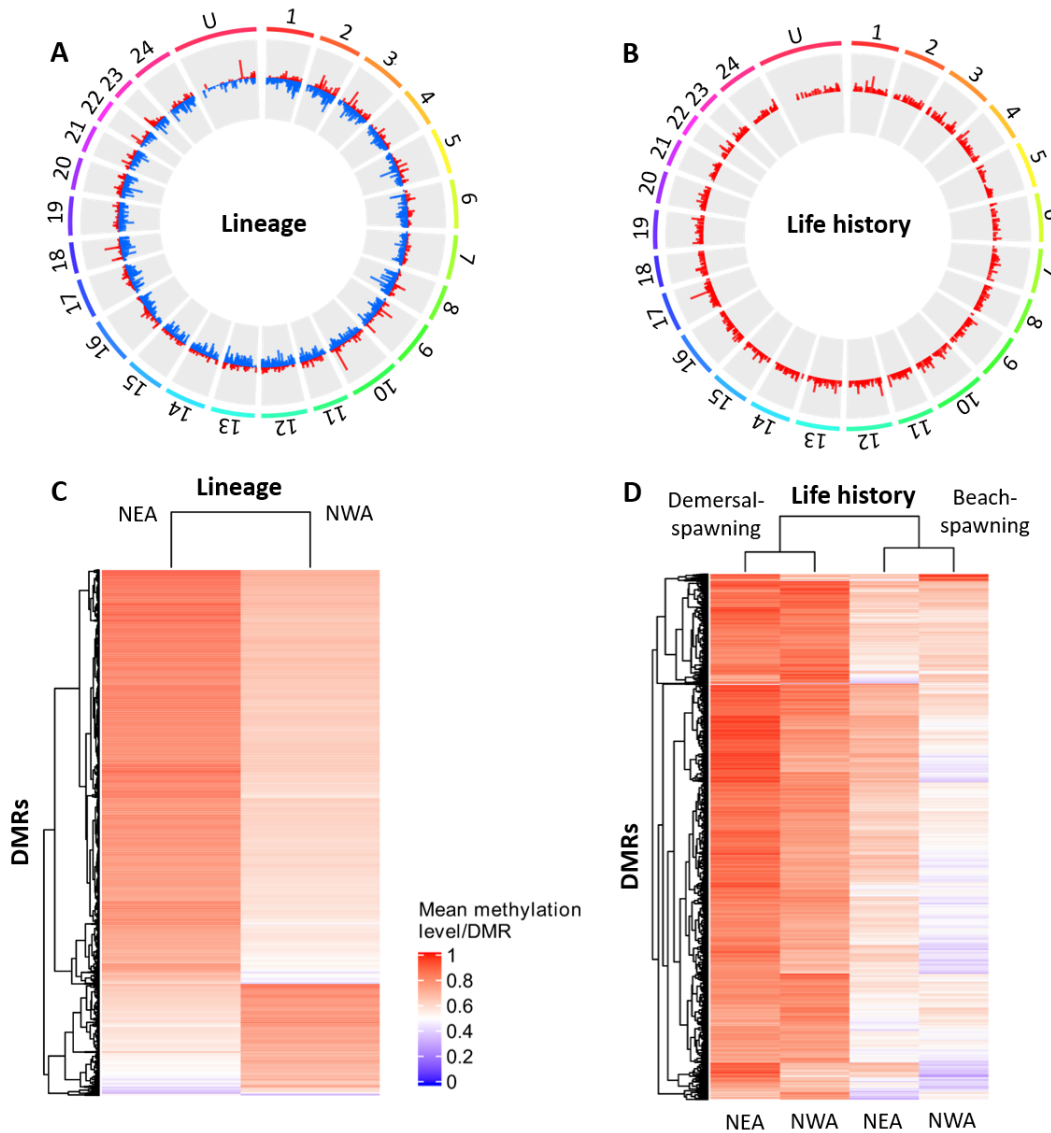

333  
334 **Fig.3.** Difference in methylation profiles between lineages (NAE and NWA) and life history strategies  
335 (semelparous demersal-spawning individuals vs iteroparous beach-spawning individuals) within lineages. (A-B)  
336 Circosplots show the distribution of DMRs associated with lineage and life history across the 24 chromosomes of  
337 the capelin. (C-D) Heatmaps showing the mean DNA methylation level of CpGs within identified significant  
338 DMRs in both lineages and life history comparisons. Identified DMRs allowed segregating NEA and NWA  
339 lineages (C) and clustered similar demersal-spawning and beach-spawning strategies from different lineages (D).  
340

341 We identified 251,442 significant DMLs (**Supplementary material S4**) and 1,067 significant  
342 DMRs (**Supplementary material S5**) predicting individual's life history strategy (**Fig. 3B** and **3D**), and  
343 shared in parallel by both lineages despite their pronounced genetic and methylation divergence. The  
344 parallel DMRs contained 15,818 CpGs. The unsupervised clustering of DMR methylation profiles first  
345 separated both lineages (**Fig 3C**) and then clustered "demersal" life history strategy capelin from each  
346 lineage (**Fig 3D**). All (100%) of the 1,067 parallel were hypermethylated in capelin of the demersal life  
347 history strategy (**Fig.3A** and **3B**). The DMR were homogeneously spread along the genome (**Fig.3A**):  
348 22% of the DMRs (237 DMRs; **Supplementary material S6**) were located within 5-kb around genes  
349 whereas 1% of the DMRs (11 DMRs; **Supplementary material S6**) were located within the sequence  
350 of protein-coding genes (transcript names and GOs provided in **Supplementary material S7**). Several  
351 of these genes were involved in the regulation of brain and central nervous system development

352 (transcript names: XM\_012822573.1; XM\_012835203.1; XM\_012824747.1; XM\_012829347.1;  
353 XM\_012823759.1) and the immune system (transcript names: XM\_012831717.1; XM\_012825256.1).  
354 The profile of the DMRs between life history strategies showed variable length (**Supplementary**  
355 **material S8, Fig. S1A**) and density of CpGs (**Fig. S1B**), with a strong correlation between the number  
356 of CpGs per DMR and the score of differentiation (AreaStat) between life history strategies (Pearson's  
357  $r=0.55$ ,  $P<0.001$ , **Fig. S1C**).

358

## 359 **Discussion**

360

361 The molecular basis of reproductive lifespan and its correlated life history components are still poorly  
362 understood, despite the tremendous importance of this issue to better predict organism's responses to  
363 environmental variability. Our results support the hypothesis that environmentally-related variation in  
364 reproductive strategy and related lifespan are more likely governed by epigenetic changes than by  
365 differences in DNA sequence in the Capelin. We found negligible genetic variation between the two life  
366 history strategies within each capelin lineage from two continents. By contrast, our results showed a  
367 strong differentiation in the methylome of demersal- and beach-spawning capelin, supporting a  
368 functional role of epigenetics in the regulation of life history strategies in wild populations. Moreover,  
369 the methylation differentiation was observed across the two capelin lineages that diverged  
370 approximately 2.5 Mya (Dodson et al. 2007, Cayuela et al. 2020), demonstrating that similar methylome  
371 modifications are associated with the differential expression of life history strategies that evolved on  
372 both sides of the North Atlantic.

373

### 374 *Methylation variation between ancient capelin lineages*

375

376 Our results show that, after controlling for life history strategy, 17% of genome-wide methylation  
377 variation is associated with ancient lineages that began to diverge approximately 2.5 MyA. Factors  
378 responsible for this level of divergence are speculative at this time but inter-lineage differences could  
379 originate in the divergent environmental characteristics of capelin marine habitat in the NEA and NWA,  
380 respectively. Indeed, it has been shown that biotic (e.g., trophic resources; Morán et al. 2013) and abiotic  
381 factors (e.g., temperature; Campos et al. 2013, Metzger & Schulte 2017) may impact methylation  
382 patterns in both marine and freshwater fishes. Furthermore, difference in methylation between lineages  
383 might also result from the strong inter-lineage genetic divergence, since 28% of the overall methylation  
384 variation is associated with the genetic background in the capelin. A similar effect of the genetic  
385 background on methylation has previously been reported in plants (Seymour et al. 2014) and humans  
386 (Bell et al. 2011).

387

### 388 *Negligible genetic differentiation between life history strategies*

389

390 Our study revealed weak genetic difference between capelin of the two life history strategies and this  
391 was repeated within the two lineages. The  $F_{ST}$  values (close to 0) indicated pronounced gene flow, if not  
392 panmixia, among individuals with the two life history strategies. Moreover, the amount of genetic  
393 variation associated with life history strategy was negligible. This result is congruent with previous  
394 studies that have revealed marginal genetic variation between beach and demersal spawning sites within  
395 the NWA lineage using mitochondrial DNA, microsatellites and SNPs (Dodson et al. 1991, Præbel et  
396 al. 2008, Kenchington et al. 2015, Cayuela et al. 2020). Nevertheless, the absence of marked genomic  
397 differentiation between demersal-spawners and beach-spawners does not rule out the possibility of a  
398 partial limited control of these life history strategies through a limited number of genes. Indeed, Cayuela  
399 et al. (2020) identified 105 SNP outliers associated with capelin life history strategies in the lineage

400 NWA, suggesting that genetic variation between demersal-spawners and beach-spawners is likely  
401 maintained in some genomic regions via spatially varying selection and/or habitat matching choice  
402 despite high gene flow.

403

404 *Differences in methylation between life histories strategies across different lineages*

405

406 Our results revealed that 4% of the methylation variation is associated with life histories after controlling  
407 for lineages and that 251,442 DML and 1,067 DMRs were implicated in this differentiation. Moreover,  
408 we showed that after controlling for the whole genetic background, 1.8% of the methylation variation  
409 associated to life history strategy difference was shared between both lineages. This indicates parallel  
410 environmentally induced variation of methylation across both capelin lineages and supports the role of  
411 epigenetics as one of the molecular mechanisms involved in the intraspecific shifts of life history  
412 strategy. Strikingly, the 1,067 DMRs recurrently presented higher level of methylation in demersal-  
413 spawning individuals than in beach-spawning individuals in both capelin lineages.

414

415 The differences in methylation associated with life history strategies are likely induced by water  
416 temperature experienced during embryonic development, the stage at which temperature usually  
417 influences most DNA methylation patterns in fishes (Anastasiadi et al. 2017, Burgerhout et al. 2017,  
418 Lallias et al. 2020, Sävilammi et al. 2020). This interpretation is supported by an experimental study on  
419 *Dicentrarchus labrax* (Anastasiadi et al. 2017), which found that genome-wide reprogramming events  
420 of methylation marks induced by temperature usually take place shortly after fertilization and are  
421 completed during embryogenesis rather than later in life (i.e., larvae and juvenile stages). It is also  
422 noteworthy that epigenomic modifications mediated by temperature are very unlikely to occur in adults  
423 when they return to reproduce, since they usually spend less than 24 hours on spawning sites (Davoren  
424 2013). Moreover, embryonic development at low temperature is expected to result in the genome-wide  
425 hypermethylation observed in our study. A comparative study across fish species showed that cold water  
426 is usually associated with a general increase of methylation level along the genome (Varriale & Bernardi  
427 2006; but also see Metzger & Schulte 2017). Penton et al. (2012) reported higher hourly and mean daily  
428 incubation temperatures at a beach spawning site, relative to demersal spawning site, on the northeast  
429 Newfoundland coast, which was supported by a literature review of temperatures at spawning locations  
430 in the wider North Atlantic. Therefore, it is plausible that differences in thermal conditions prevailing  
431 during embryonic growth in beach- and demersal-spawning sites may be responsible for the observed  
432 methylation differences in adult capelin. This association supposes that adults return preferentially  
433 reproduce in their habitat of birth (i.e., habitat matching choice), but not necessarily at the same locations  
434 unlike the homing behavior observed in salmonid fishes for instance (Keefer & Caudill 2014). Habitat  
435 matching choice (*sensu* Edelaar et al. 2008) has previously been proposed as a mechanism to explain  
436 local adaptation to environmental conditions prevailing in capelin beaching-spawning sites despite high  
437 gene flow (Cayuela et al. 2020).

437

438 Our results showed that hypermethylation is associated with reduced reproductive lifespan and  
439 high actuarial senescence in demersal-spawning individuals. This association suggests that methylation  
440 modification induced at the embryonic stage could cause differences in mortality patterns later in life.  
441 Indeed, the hypermethylation of regulatory regions or sequence of genes involved in the regulation of  
442 central nervous system and immunity responses could lead to stronger aging and shorter reproductive  
443 lifespan in demersal-spawning individuals than in beach-spawning ones. Although the existence of such  
444 a mechanism in fishes is still unknown, it has been repeatedly observed in humans where a number of  
445 hypermethylated genes are associated with age-related diseases, increased senescence, and reduced  
446 lifespan (Post et al. 1999, So et al. 2006, Zampieri et al. 2015). The overall hypomethylation of those  
447 genes in beach-spawning individuals could contribute to longer lifespan and slower actuarial  
448 senescence, thus allowing facultative iteroparity. If iteroparity effectively allows increasing individuals

448 fitness in variable environments as expected by theoretical models (Bulmer 1985, Tuljapurkar 2013),  
449 methylation modifications experienced at early stage would be adaptive and could provide a selective  
450 advantage to beach-born individuals reproducing in their natal highly variable habitat. Our study would  
451 thus provide empirical evidence for parallel adaptive plasticity allowing fish from lineages that have  
452 divergence for 2.5 Mya to cope with similar sources of environmental variability. Admittedly, further  
453 experimental studies will be needed to rigorously test this hypothesis and examine how methylation and  
454 gene expression are associated with lifespan and aging rate of demersal- and beach-spawning individuals  
455 in common garden experiments.

456

#### 457 *Research avenues*

458

459 Our study supports the hypothesis that thermal conditions experienced during early development may  
460 affect genome-wide methylation patterns later in life and indicated that those epigenetic changes are  
461 associated with the expression of very distinct life history strategies. As such, this study offers novel  
462 research avenues, notably pertaining to the epigenetic clock which generality and properties have poorly  
463 been investigated so far in ectotherms (but see Anastasiadi & Piferrer 2020 for fish). It also raises  
464 important questions about the influence of thermal variation induced by climate change on the  
465 epigenome of ectotherms, and their consequences on individual life trajectories and ultimately the  
466 demography of wild populations.

467

#### 468 **Acknowledgements**

469 We thank biologists and technicians of the Department of Fisheries and Oceans Canada for their  
470 implication as well as all everyone who contributed to sampling throughout the study area. This research  
471 was funded by a Strategic Project Grant from the Natural Sciences and Engineering Research Council  
472 of Canada (NSERC) to L. Bernatchez, M. Clément and P. Sirois, a financial contribution of Resources  
473 Aquatiques Québec and was also supported by in-kind contribution from many other organisations:  
474 Department of Fisheries and Oceans Canada, Nunatsiavut Government, NunatuKavut Community  
475 Council, Labrador Fishermen's Union Shrimp Company, Department of Fisheries and Aquaculture –  
476 Government of Newfoundland and Labrador, World Wildlife Fund Canada, St. Lawrence Global  
477 Observatory, Parc Marin du Saguenay–Saint-Laurent, Manitoba University, and the Greenland Institute  
478 of Natural Resources. Hugo Cayuela was supported by a Vanier-Banting postdoctoral fellowship and  
479 the Swiss National Science Foundation (grant number: 31003A\_182265).

480

#### 481 **Contribution statement**

482 H.C. wrote the paper. H.C., C.R., C.M., M.L., and E.N. made the bioinformatics and the statistical  
483 analyses. L.B., M.C. and P.S. initiated the project, and L.B. conceptualized and coordinated the work.  
484 All authors read and edited the final manuscript version.

485

#### 486 **References**

487

- 488 Aljanabi, S. M., & Martinez, I. (1997). Universal and rapid salt-extraction of high quality genomic DNA  
489 for PCR-based techniques. *Nucleic Acids Research*, 25, 4692-4693.
- 490 Anastasiadi, D., Díaz, N., & Piferrer, F. (2017). Small ocean temperature increases elicit stage-  
491 dependent changes in DNA methylation and gene expression in a fish, the European sea bass.  
492 *Scientific Reports*, 7, 1-12.
- 493 Anastasiadi, D., & Piferrer, F. (2020). A clockwork fish: Age prediction using DNA methylation-based  
494 biomarkers in the European seabass. *Molecular Ecology Resources*, 20, 387-397.

- 495 Austad, S. N., & Hoffman, J. M. (2018). Is antagonistic pleiotropy ubiquitous in aging biology?  
496 Evolution, Medicine, and Public Health, 2018, 287-294.
- 497 Baym, M., Kryazhimskiy, S., Lieberman, T. D., Chung, H., Desai, M. M., & Kishony, R. (2015).  
498 Inexpensive multiplexed library preparation for megabase-sized genomes. PloS one, 10, e0128036.
- 499 Bell, J. T., Pai, A. A., Pickrell, J. K., Gaffney, D. J., Pique-Regi, R., Degner, J. F., [...] & Pritchard, J.  
500 K. (2011). DNA methylation patterns associate with genetic and gene expression variation in  
501 HapMap cell lines. Genome Biology, 12, R10.
- 502 Blanquart, F., Kaltz, O., Nuismer, S. L., & Gandon, S. (2013). A practical guide to measuring local  
503 adaptation. Ecology Letters, 16, 1195-1205.
- 504 Browner, W. S., Kahn, A. J., Ziv, E., Reiner, A. P., Oshima, J., Cawthon, R. M., [...] & Cummings, S.  
505 R. (2004). The genetics of human longevity. The American Journal of Medicine, 117, 851-860.
- 506 Bulmer, M. G. (1985). Selection for iteroparity in a variable environment. The American Naturalist,  
507 126, 63-71.
- 508 Burgerhout, E., Mommens, M., Johnsen, H., Aunsmo, A., Santi, N., & Andersen, Ø. (2017). Genetic  
509 background and embryonic temperature affect DNA methylation and expression of myogenin and  
510 muscle development in Atlantic salmon (*Salmo salar*). PloS one, 12, e0179918.
- 511 Campos, C., Valente, L., Conceição, L., Engrola, S., & Fernandes, J. (2013). Temperature affects  
512 methylation of the myogenin putative promoter, its expression and muscle cellularity in Senegalese  
513 sole larvae. Epigenetics, 8, 389-397.
- 514 Cayuela, H., Arsovski, D., Thirion, J. M., Bonnaire, E., Pichenot, J., Boitaud, S., [...] & Besnard, A.  
515 (2016). Contrasting patterns of environmental fluctuation contribute to divergent life histories among  
516 amphibian populations. Ecology, 97, 980-991.
- 517 Cayuela, H., Cruickshank, S. S., Brandt, H., Ozigul, A., & Schmidt, B. R. (2019). Habitat-driven life  
518 history variation in an amphibian metapopulation. Oikos, 128, 1265-1276.
- 519 Cayuela, H., Rougemont, Q., Laporte, M., Mérot, C., Normandeau, E., Dorant, Y., Tørresen, O. K.,  
520 Hoff, S. N. K., Jentoft, S., Sirois, P., Castonguay, M., Jansen, T. Praebel, K., Clément, M., &  
521 Bernatchez L. (2019). Shared ancestral polymorphism and chromosomal rearrangements as potential  
522 drivers of local adaptation in a marine fish. Molecular Ecology, 29, 2379-2398.
- 523 Chen, S., Zhou, Y., Chen, Y., & Gu, J. (2018). fastp: an ultra-fast all-in-one FASTQ preprocessor.  
524 Bioinformatics, 34, i884-i890.
- 525 Christiansen, J. S., Præbel, K., Siikavuopio, S. I., & Carscadden, J. E. (2008). Facultative semelparity  
526 in capelin *Mallotus villosus* (Osmeridae)-an experimental test of a life history phenomenon in a sub-  
527 arctic fish. Journal of Experimental Marine Biology and Ecology, 360, 47-55.
- 528 Ciccarone, F., Tagliatesta, S., Caiafa, P., & Zampieri, M. (2018). DNA methylation dynamics in aging:  
529 how far are we from understanding the mechanisms?. Mechanisms of ageing and development, 174,  
530 3-17.
- 531 Dodson, J. J., Carscadden, J. E., Bernatchez, L., & Colombani, F. (1991). Relationship between  
532 spawning mode and phylogeographic structure in mitochondrial DNA of North Atlantic capelin  
533 *Mallotus villosus*. Marine Ecology Progress Series, 76, 103-113.
- 534 Dodson, J. J., Tremblay, S., Colombani, F., Carscadden, J. E., & Lecomte, F. (2007). Trans-Arctic  
535 dispersals and the evolution of a circumpolar marine fish species complex, the capelin (*Mallotus*  
536 *villosus*). Molecular Ecology, 16, 5030-5043.
- 537 Edelaar, P., Siepielski, A. M., & Clobert, J. (2008). Matching habitat choice causes directed gene flow:  
538 a neglected dimension in evolution and ecology. Evolution, 62, 2462-2472.
- 539 Flatt, T., & Partridge, L. (2018). Horizons in the evolution of aging. BMC biology, 16, 1-13.
- 540 Frank, K. T., & Leggett, W. C. (1981). Wind regulation of emergence times and early larval survival in  
541 capelin (*Mallotus villosus*). Canadian Journal of Fisheries and Aquatic Sciences, 38(2), 215-223.
- 542 Gaillard, J. M., & Yoccoz, N. G. (2003). Temporal variation in survival of mammals: a case of  
543 environmental canalization?. Ecology, 84, 3294-3306.
- 544 Goldberg, A. D., Allis, C. D., & Bernstein, E. (2007). Epigenetics: a landscape takes shape. Cell, 128,  
545 635-638.

- 546 Grönninger, E., Weber, B., Heil, O., Peters, N., Stäb, F., Wenck, H., [...] & Lyko, F. (2010). Aging and  
547 chronic sun exposure cause distinct epigenetic changes in human skin. *PLoS genetics*, 6, e1000971.
- 548 Guo, W., Fiziev, P., Yan, W., Cokus, S., Sun, X., Zhang, M. Q., [...] & Pellegrini, M. (2013). BS-  
549 Seeker2: a versatile aligning pipeline for bisulfite sequencing data. *BMC Genomics*, 14, 1-8.
- 550 Guo, W., Zhu, P., Pellegrini, M., Zhang, M. Q., Wang, X., & Ni, Z. (2018). CGmapTools improves the  
551 precision of heterozygous SNV calls and supports allele-specific methylation detection and  
552 visualization in bisulfite-sequencing data. *Bioinformatics*, 34, 381-387.
- 553 Hoffmann, A. A., Merilä, J., & Kristensen, T. N. (2016). Heritability and evolvability of fitness and  
554 nonfitness traits: lessons from livestock. *Evolution*, 70, 1770-1779.
- 555 Horvath, S. (2013). DNA methylation age of human tissues and cell types. *Genome biology*, 14(10),  
556 3156.
- 557 Horvath, S., & Raj, K. (2018). DNA methylation-based biomarkers and the epigenetic clock theory of  
558 ageing. *Nature Reviews Genetics*, 19, 371.
- 559 Johnson, M. D., Mueller, M., Game, L., Aitman, T. J. (2012). Single nucleotide analysis of cytosine  
560 methylation by whole-genome shotgun bisulfite sequencing. *Current Protocols in Molecular  
561 Biology*, 99, 21.23.1-21.23.28.
- 562 Keefer, M. L., & Caudill, C. C. (2014). Homing and straying by anadromous salmonids: a review of  
563 mechanisms and rates. *Reviews in Fish Biology and Fisheries*, 24, 333-368.
- 564 Kenchington, E. L., Nakashima, B. S., Taggart, C. T., & Hamilton, L. C. (2015). Genetic structure of  
565 capelin (*Mallotus villosus*) in the Northwest Atlantic Ocean. *PloS one*, 10, e0122315.
- 566 Klutstein, M., Nejman, D., Greenfield, R., & Cedar, H. (2016). DNA methylation in cancer and aging.  
567 *Cancer Research*, 76, 3446-3450.
- 568 Lallias, D., Bernard, M., Ciobotaru, C., Dechamp, N., Labbé, L., Goardon, L., [...] & Charles, M. (2020).  
569 Sources of variation of DNA methylation in rainbow trout: combined effects of temperature and  
570 genetic background. *Epigenetics*. DOI: 10.1080/15592294.2020.1834924
- 571 Langmead, B., & Salzberg, S. L. (2012). Fast gapped-read alignment with Bowtie 2. *Nature methods*,  
572 9, 357.
- 573 Le Luyer, J., Laporte, M., Beacham, T. D., Kaukinen, K. H., Withler, R. E., Leong, J. S., Rondeau, E.  
574 B., Koop, B. F., & Bernatchez, L. (2017). Parallel epigenetic modifications induced by hatchery  
575 rearing in a Pacific salmon. *Proceedings of the National Academy of Sciences*, 114, 12964-12969.
- 576 Legendre, P., & Legendre, L. F. (2012). *Numerical ecology*. Elsevier.
- 577 Li, H., Handsaker, B., Wysoker, A., Fennell, T., Ruan, J., Homer, N., [...] & Durbin, R. (2009). The  
578 sequence alignment/map format and SAMtools. *Bioinformatics*, 25(16), 2078-2079.
- 579 Lind, M. I., Ratikainen, I. I., Andersson, J., Carlsson, H., Krieg, T., Larva, T., & Maklakov, A. A. (2020).  
580 Variable environments select for short lifespan. *bioRxiv*,  
581 <https://doi.org/10.1101/2020.01.29.924373>.
- 582 Lowe, R., Barton, C., Jenkins, C. A., Ernst, C., Forman, O., Fernandez-Twinn, D. S., [...] & Walter, L.  
583 (2018). Ageing-associated DNA methylation dynamics are a molecular readout of lifespan variation  
584 among mammalian species. *Genome Biology*, 19, 1-8.
- 585 Marioni, R. E., Shah, S., McRae, A. F., Chen, B. H., Colicino, E., Harris, S. E., [...] & Pattie, A. (2015).  
586 DNA methylation age of blood predicts all-cause mortality in later life. *Genome Biology*, 16, 25.
- 587 Merilä, J., & Sheldon, B. C. (1999). Genetic architecture of fitness and nonfitness traits: empirical  
588 patterns and development of ideas. *Heredity*, 83, 103-109.
- 589 Meisner, J., & Albrechtsen, A. (2018). Inferring population structure and admixture proportions in low-  
590 depth NGS data. *Genetics*, 210, 719-731.
- 591 Metzger, D. C., & Schulte, P. M. (2017). Persistent and plastic effects of temperature on DNA  
592 methylation across the genome of threespine stickleback (*Gasterosteus aculeatus*). *Proceedings of  
593 the Royal Society B: Biological Sciences*, 284, 20171667.
- 594 Morán, P., Marco-Rius, F., Megías, M., Covelo-Soto, L., & Pérez-Figueroa, A. (2013). Environmental  
595 induced methylation changes associated with seawater adaptation in brown trout. *Aquaculture*, 392,  
596 77-83.

- 597 Murphy, G. I. (1968). Pattern in life history and the environment. *The American Naturalist*, 102, 391-  
598 403.
- 599 Nevoux, M., Forcada, J., Barbraud, C., Croxall, J., & Weimerskirch, H. (2010). Bet-hedging response  
600 to environmental variability, an intraspecific comparison. *Ecology*, 91, 2416-2427.
- 601 Pal, S., & Tyler, J. K. (2016). Epigenetics and aging. *Science Advances*, 2, e1600584.
- 602 Parrott, B. B., & Bertucci, E. M. (2019). Epigenetic aging clocks in ecology and evolution. *Trends in*  
603 *Ecology & Evolution*, 34, 767-770.
- 604 Penton, P. M., Davoren, G. K., Montevecchi, W. A., & Andrews, D. W. (2012). Beach and demersal  
605 spawning in capelin (*Mallotus villosus*) on the northeast Newfoundland coast: egg developmental  
606 rates and mortality. *Canadian Journal of Zoology*, 90, 248-256.
- 607 Post, W. S., Goldschmidt-Clermont, P. J., Wilhide, C. C., Heldman, A. W., Sussman, M. S., Ouyang,  
608 P., [...] & Issa, J. P. J. (1999). Methylation of the estrogen receptor gene is associated with aging and  
609 atherosclerosis in the cardiovascular system. *Cardiovascular Research*, 43, 985-991.
- 610 Præbel, K., Westgaard, J. I., Fevolden, S. E., & Christiansen, J. S. (2008). Circumpolar genetic  
611 population structure of capelin *Mallotus villosus*. *Marine Ecology Progress Series*, 360, 189-199.
- 612 Price, T., & Schluter, D. (1991). On the low heritability of life-history traits. *Evolution*, 45, 853-861.
- 613 Promislow, D. E., & Harvey, P. H. (1990). Living fast and dying young: A comparative analysis of life-  
614 history variation among mammals. *Journal of Zoology*, 220, 417-437.
- 615 Reynolds, L. M., Taylor, J. R., Ding, J., Lohman, K., Johnson, C., Siscovick, D., [...] & Liu, Y. (2014).  
616 Age-related variations in the methylome associated with gene expression in human monocytes and  
617 T cells. *Nature Communications*, 5, 1-8.
- 618 Sävillammi, T., Papakostas, S., Leder, E. H., Vøllestad, L. A., Debes, P. V., & Primmer, C. R. (2020).  
619 Cytosine methylation patterns suggest a role of methylation in plastic and adaptive responses to  
620 temperature in European grayling (*Thymallus thymallus*) populations. *Epigenetics*, 1-18.
- 621 Savolainen, O., Lascoux, M., & Merilä, J. (2013). Ecological genomics of local adaptation. *Nature*  
622 *Reviews Genetics*, 14, 807-820.
- 623 Seymour, D. K., Koenig, D., Hagmann, J., Becker, C., & Weigel, D. (2014). Evolution of DNA  
624 methylation patterns in the Brassicaceae is driven by differences in genome organization. *PLoS*  
625 *genetics*, 10, e1004785.
- 626 Smith, Z. D., & Meissner, A. (2013). DNA methylation: roles in mammalian development. *Nature*  
627 *Reviews Genetics*, 14, 204-220.
- 628 So, K., Tamura, G., Honda, T., Homma, N., Waki, T., Togawa, N., [...] & Motoyama, T. (2006). Multiple  
629 tumor suppressor genes are increasingly methylated with age in non-neoplastic gastric epithelia.  
630 *Cancer science*, 97, 1155-1158.
- 631 Stearns, S. C. (1976). Life-history tactics: a review of the ideas. *The Quarterly Review of Biology*, 51,  
632 3-47.
- 633 Stearns, S. C. (1989). Trade-offs in life-history evolution. *Functional Ecology*, 3, 259-268.
- 634 Stubbs, T. M., Bonder, M. J., Stark, A. K., Krueger, F., von Meyenn, F., Stegle, O., & Reik, W. (2017).  
635 Multi-tissue DNA methylation age predictor in mouse. *Genome Biology*, 18, 68.
- 636 Therkildsen, N. O., & Palumbi, S. R. (2017). Practical low-coverage genomewide sequencing of  
637 hundreds of individually barcoded samples for population and evolutionary genomics in nonmodel  
638 species. *Molecular Ecology Resources*, 17, 194-208.
- 639 Tuljapurkar, S. (2013). *Population dynamics in variable environments*. Springer Science & Business  
640 Media.
- 641 Valenzano, D. R., Benayoun, B. A., Singh, P. P., Zhang, E., Etter, P. D., Hu, C. K., [...] & Machado, B.  
642 E. (2015). The African turquoise killifish genome provides insights into evolution and genetic  
643 architecture of lifespan. *Cell*, 163, 1539-1554.
- 644 Varriale, A., & Bernardi, G. (2006). DNA methylation and body temperature in fishes. *Gene*, 385, 111-  
645 121.
- 646 Wilbur, H. M., & Rudolf, V. H. (2006). Life-history evolution in uncertain environments: bet hedging  
647 in time. *The American Naturalist*, 168, 398-411.

- 648 Wu, H., Wang, C., & Wu, Z. (2013). A new shrinkage estimator for dispersion improves differential  
649 expression detection in RNA-seq data. *Biostatistics*, 14, 232-243.
- 650 Zampieri, M., Ciccarone, F., Calabrese, R., Franceschi, C., Bürkle, A., & Caiafa, P. (2015).  
651 Reconfiguration of DNA methylation in aging. *Mechanisms of Ageing and Development*, 151, 60-  
652 70.
